# Supplementary material for: Growth of Chlamydia pneumoniae Is Enhanced in Cells with Impaired Mitochondrial Function
Source: PubMed Central journal article supplement (PMC5723314; doi:10.3389/fcimb.2017.00499), 2017-12-05
Supplement: Image1.pdf [file Image1.pdf]

**A**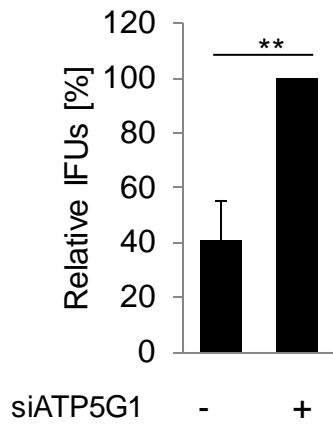**B**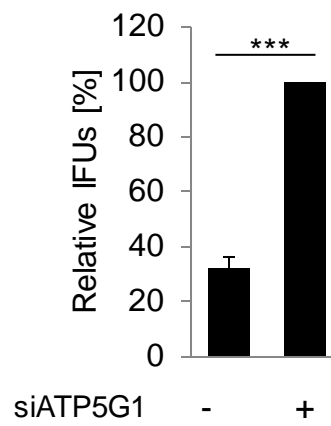

**Supplementary Figure 1: Effect of second and third siRNA on chlamydial recovery.**

Recoverable *C. pneumoniae* from negative siRNA treated and ATP5G1 knockdown cells (A) ATP5G1HSS141316 and (B) ATP5G1HSS182194 (\*\* $p \leq 0.01$ ; \*\*\* $p \leq 0.001$ ;  $n=3$ ).
