# Supplementary material for: Growth of Chlamydia pneumoniae Is Enhanced in Cells with Impaired Mitochondrial Function
Source: PubMed Central journal article supplement (PMC5723314; doi:10.3389/fcimb.2017.00499), 2017-12-05
Supplement: Image2.pdf [file Image2.pdf]

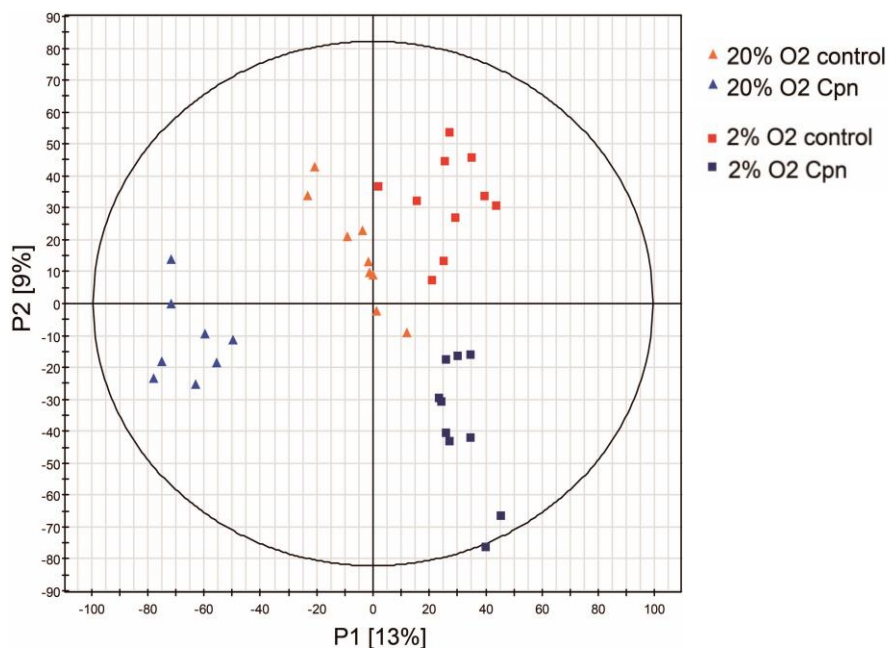

**Supplementary Figure 2: Non-targeted metabolic screen of non-infected and *C. pneumoniae*-infected HEp-2 cells under normoxia and hypoxia.**

Score plots of PLS-DA model of ICR/FT-MS data of non-infected and *C. pneumoniae*-infected HEp-2 cells under normoxia and hypoxia. The conditions could be differentiated based on the expression of their metabolites patterns (n=10).
