# Supplementary material for: Growth of Chlamydia pneumoniae Is Enhanced in Cells with Impaired Mitochondrial Function
Source: PubMed Central journal article supplement (PMC5723314; doi:10.3389/fcimb.2017.00499), 2017-12-05
Supplement: Image3.pdf [file Image3.pdf]

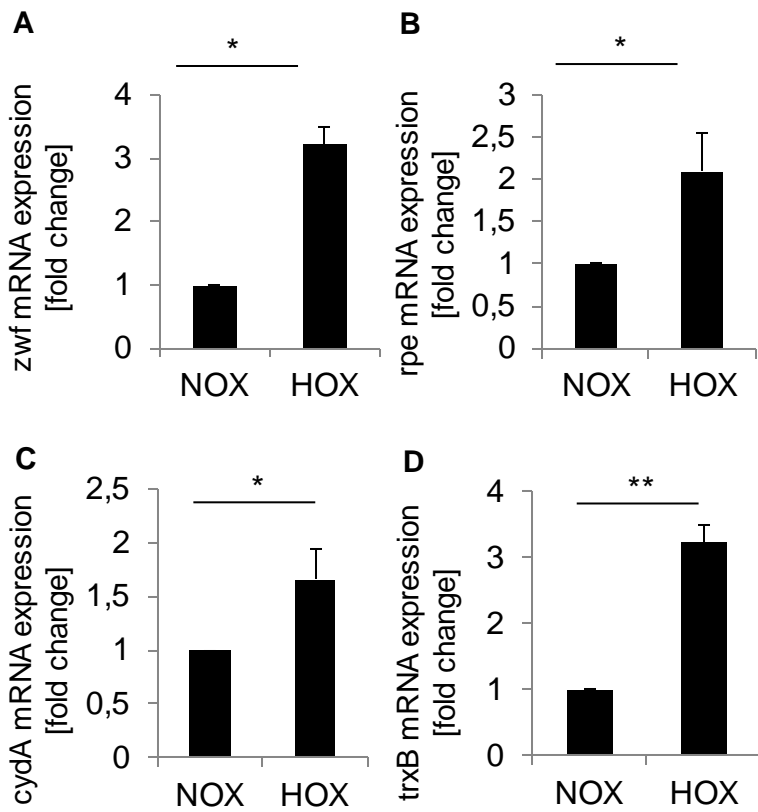

**Supplementary Figure 3: Validation of selected chlamydial genes upregulated in the transcriptome screen.**

(A) Glucose-6-phosphate 1-dehydrogenase (zwf) (n=4), (B) ribulose-phosphate 3-epimerase (rpe) (n=5), (C) cytochrome D ubiquinol oxidase subunit I (cydA) and (n=8) (D) thioredoxin reductase (trxB) (n=4) of *C. pneumoniae* grown in HEP-2 cells under normoxia or hypoxia 24 hpi were analyzed by qRT-PCR and normalized to 16S rRNA (\*p<0.05; \*\*p<0.01).
